# Supplementary material
Source: MDPI journal article supplement (https://www.mdpi.com/2075-163X/13/12/1554)
Supplement: s1 [file s1]

**Table S1.** LA-ICP-MS zircon U-Pb data for the Permian granites in the Chifeng area.

| Sample        | $w_B/\text{ppm}$ |      |      | Th/U | Isotope ratio                                |         |                                              |         | T (Ma)                                       |    |                                              |   |
|---------------|------------------|------|------|------|----------------------------------------------|---------|----------------------------------------------|---------|----------------------------------------------|----|----------------------------------------------|---|
|               | Pb               | Th   | U    |      | $^{207}\text{Pb}/^{235}\text{U} \pm 1\sigma$ |         | $^{206}\text{Pb}/^{238}\text{U} \pm 1\sigma$ |         | $^{207}\text{Pb}/^{235}\text{U} \pm 1\sigma$ |    | $^{206}\text{Pb}/^{238}\text{U} \pm 1\sigma$ |   |
| PM210-12-1-01 | 18               | 479  | 306  | 1.57 | 0.30120                                      | 0.01548 | 0.04258                                      | 0.00071 | 267                                          | 12 | 269                                          | 4 |
| PM210-12-1-02 | 43               | 847  | 798  | 1.06 | 0.30296                                      | 0.00754 | 0.04262                                      | 0.00056 | 269                                          | 6  | 269                                          | 3 |
| PM210-12-1-03 | 22               | 372  | 416  | 0.89 | 0.31363                                      | 0.00938 | 0.04399                                      | 0.00060 | 277                                          | 7  | 278                                          | 4 |
| PM210-12-1-04 | 17               | 321  | 340  | 0.94 | 0.31135                                      | 0.00988 | 0.04404                                      | 0.00062 | 275                                          | 8  | 278                                          | 4 |
| PM210-12-1-05 | 14               | 309  | 239  | 1.30 | 0.31456                                      | 0.01159 | 0.04321                                      | 0.00062 | 278                                          | 9  | 273                                          | 4 |
| PM210-12-1-06 | 21               | 194  | 461  | 0.42 | 0.30855                                      | 0.00980 | 0.04323                                      | 0.00060 | 273                                          | 8  | 273                                          | 4 |
| PM210-12-1-07 | 19               | 365  | 361  | 1.01 | 0.30706                                      | 0.00932 | 0.04290                                      | 0.00058 | 272                                          | 7  | 271                                          | 4 |
| PM210-12-1-08 | 22               | 382  | 444  | 0.86 | 0.29926                                      | 0.00875 | 0.04198                                      | 0.00057 | 266                                          | 7  | 265                                          | 4 |
| PM210-12-1-09 | 19               | 282  | 384  | 0.73 | 0.29478                                      | 0.00893 | 0.04230                                      | 0.00059 | 262                                          | 7  | 267                                          | 4 |
| PM210-12-1-10 | 19               | 286  | 373  | 0.77 | 0.30602                                      | 0.00961 | 0.04306                                      | 0.00060 | 271                                          | 7  | 272                                          | 4 |
| PM210-12-1-11 | 17               | 241  | 348  | 0.69 | 0.30275                                      | 0.01157 | 0.04236                                      | 0.00062 | 269                                          | 9  | 267                                          | 4 |
| PM210-12-1-12 | 19               | 325  | 356  | 0.91 | 0.31134                                      | 0.01202 | 0.04358                                      | 0.00063 | 275                                          | 9  | 275                                          | 4 |
| PM210-12-1-13 | 14               | 159  | 289  | 0.55 | 0.33868                                      | 0.01064 | 0.04183                                      | 0.00059 | 296                                          | 8  | 264                                          | 4 |
| PM210-12-1-14 | 18               | 311  | 359  | 0.87 | 0.30850                                      | 0.01079 | 0.04329                                      | 0.00062 | 273                                          | 8  | 273                                          | 4 |
| PM210-12-1-15 | 17               | 294  | 349  | 0.84 | 0.30095                                      | 0.01365 | 0.04176                                      | 0.00062 | 267                                          | 11 | 264                                          | 4 |
| PM210-12-1-16 | 27               | 505  | 525  | 0.96 | 0.30742                                      | 0.00881 | 0.04298                                      | 0.00058 | 272                                          | 7  | 271                                          | 4 |
| PM210-12-1-17 | 17               | 259  | 343  | 0.76 | 0.29843                                      | 0.00972 | 0.04209                                      | 0.00058 | 265                                          | 8  | 266                                          | 4 |
| PM210-12-1-18 | 18               | 289  | 359  | 0.80 | 0.30452                                      | 0.00879 | 0.04270                                      | 0.00059 | 270                                          | 7  | 270                                          | 4 |
| PM210-12-1-19 | 30               | 560  | 580  | 0.97 | 0.30524                                      | 0.00784 | 0.04273                                      | 0.00057 | 270                                          | 6  | 270                                          | 4 |
| PM210-12-1-20 | 21               | 365  | 406  | 0.90 | 0.30491                                      | 0.00922 | 0.04271                                      | 0.00058 | 270                                          | 7  | 270                                          | 4 |
| PM210-12-1-21 | 22               | 365  | 435  | 0.84 | 0.29347                                      | 0.00886 | 0.04275                                      | 0.00059 | 261                                          | 7  | 270                                          | 4 |
| PM210-12-1-22 | 22               | 401  | 414  | 0.97 | 0.35615                                      | 0.01069 | 0.04241                                      | 0.00059 | 309                                          | 8  | 268                                          | 4 |
| PM210-12-1-23 | 21               | 417  | 413  | 1.01 | 0.30165                                      | 0.00927 | 0.04251                                      | 0.00058 | 268                                          | 7  | 268                                          | 4 |
| PM210-12-1-24 | 36               | 577  | 733  | 0.79 | 0.30270                                      | 0.00744 | 0.04261                                      | 0.00056 | 269                                          | 6  | 269                                          | 3 |
| PM105-2-2-1   | 145              | 720  | 1235 | 0.56 | 0.29673                                      | 0.00963 | 0.04136                                      | 0.00037 | 264                                          | 8  | 261                                          | 2 |
| PM105-2-2-2*  | 43               | 190  | 370  | 0.50 | 0.35780                                      | 0.01890 | 0.04256                                      | 0.00061 | 311                                          | 14 | 269                                          | 4 |
| PM105-2-2-3   | 61               | 255  | 518  | 0.46 | 0.30865                                      | 0.01715 | 0.04247                                      | 0.00065 | 273                                          | 13 | 268                                          | 4 |
| PM105-2-2-4   | 67               | 305  | 584  | 0.51 | 0.33610                                      | 0.01523 | 0.04320                                      | 0.00062 | 294                                          | 12 | 273                                          | 4 |
| PM105-2-2-5   | 168              | 773  | 1312 | 0.56 | 0.32872                                      | 0.01151 | 0.04205                                      | 0.00046 | 289                                          | 9  | 266                                          | 3 |
| PM105-2-2-6*  | 123              | 737  | 785  | 0.88 | 0.48000                                      | 0.02201 | 0.04305                                      | 0.00056 | 398                                          | 15 | 272                                          | 3 |
| PM105-2-2-7*  | 104              | 432  | 760  | 0.54 | 0.38759                                      | 0.01611 | 0.04244                                      | 0.00050 | 333                                          | 12 | 268                                          | 3 |
| PM105-2-2-8   | 111              | 460  | 962  | 0.47 | 0.31749                                      | 0.01283 | 0.04270                                      | 0.00052 | 280                                          | 10 | 270                                          | 3 |
| PM105-2-2-9   | 52               | 206  | 447  | 0.45 | 0.32860                                      | 0.01658 | 0.04448                                      | 0.00066 | 288                                          | 13 | 281                                          | 4 |
| PM105-2-2-10  | 94               | 432  | 885  | 0.47 | 0.30209                                      | 0.01287 | 0.04219                                      | 0.00046 | 268                                          | 10 | 266                                          | 3 |
| PM105-2-2-11  | 75               | 328  | 692  | 0.46 | 0.29782                                      | 0.01290 | 0.04294                                      | 0.00054 | 265                                          | 10 | 271                                          | 3 |
| PM105-2-2-12  | 60               | 256  | 545  | 0.45 | 0.31203                                      | 0.01775 | 0.04269                                      | 0.00055 | 276                                          | 14 | 269                                          | 3 |
| PM105-2-2-13  | 83               | 338  | 765  | 0.43 | 0.29531                                      | 0.01326 | 0.04180                                      | 0.00056 | 263                                          | 10 | 264                                          | 3 |
| PM105-2-2-14  | 109              | 479  | 838  | 0.55 | 0.31363                                      | 0.01319 | 0.04442                                      | 0.00055 | 277                                          | 10 | 280                                          | 3 |
| PM105-2-2-15  | 83               | 339  | 776  | 0.43 | 0.29269                                      | 0.01256 | 0.04339                                      | 0.00048 | 261                                          | 10 | 274                                          | 3 |
| PM105-2-2-16  | 50               | 208  | 455  | 0.44 | 0.31713                                      | 0.01681 | 0.04275                                      | 0.00067 | 280                                          | 13 | 270                                          | 4 |
| PM105-2-2-17  | 58               | 239  | 528  | 0.44 | 0.31952                                      | 0.01517 | 0.04240                                      | 0.00056 | 282                                          | 12 | 268                                          | 3 |
| PM105-2-2-18  | 49               | 210  | 471  | 0.43 | 0.30498                                      | 0.01446 | 0.04178                                      | 0.00056 | 270                                          | 11 | 264                                          | 3 |
| D3038-1       | 218              | 1044 | 1442 | 0.72 | 0.27712                                      | 0.00925 | 0.03976                                      | 0.00034 | 248                                          | 7  | 251                                          | 2 |
| D3038-2       | 214              | 1138 | 878  | 1.31 | 0.29200                                      | 0.01304 | 0.04070                                      | 0.00043 | 260                                          | 10 | 257                                          | 3 |
| D3038-3       | 204              | 968  | 1270 | 0.76 | 0.29048                                      | 0.00960 | 0.04115                                      | 0.00040 | 259                                          | 8  | 260                                          | 2 |
| D3038-4       | 246              | 1175 | 1845 | 0.63 | 0.27289                                      | 0.00841 | 0.03942                                      | 0.00033 | 245                                          | 7  | 249                                          | 2 |
| D3038-5       | 275              | 1062 | 2047 | 0.52 | 0.32302                                      | 0.00949 | 0.04199                                      | 0.00046 | 284                                          | 7  | 265                                          | 3 |
| D3038-6*      | 202              | 935  | 1192 | 0.78 | 0.35606                                      | 0.01276 | 0.04117                                      | 0.00039 | 309                                          | 10 | 260                                          | 2 |
| D3038-7       | 221              | 1048 | 1227 | 0.83 | 0.28741                                      | 0.00940 | 0.04197                                      | 0.00043 | 257                                          | 7  | 265                                          | 3 |
| D3038-8       | 213              | 1029 | 1380 | 0.73 | 0.28757                                      | 0.00889 | 0.04059                                      | 0.00035 | 257                                          | 7  | 256                                          | 2 |
| D3038-9       | 178              | 833  | 1162 | 0.70 | 0.28793                                      | 0.00990 | 0.04081                                      | 0.00037 | 257                                          | 8  | 258                                          | 2 |
| D3038-10      | 124              | 596  | 759  | 0.77 | 0.29174                                      | 0.01253 | 0.04232                                      | 0.00055 | 260                                          | 10 | 267                                          | 3 |

|               |        |         |         |      |         |         |         |         |      |    |      |    |
|---------------|--------|---------|---------|------|---------|---------|---------|---------|------|----|------|----|
| D3038-11      | 183    | 879     | 1277    | 0.67 | 0.29111 | 0.00975 | 0.04228 | 0.00038 | 259  | 8  | 267  | 2  |
| D3038-12      | 189    | 857     | 1250    | 0.67 | 0.30543 | 0.00999 | 0.04270 | 0.00041 | 271  | 8  | 270  | 3  |
| D3038-13      | 213    | 1046    | 1325    | 0.77 | 0.28770 | 0.00987 | 0.04172 | 0.00035 | 257  | 8  | 263  | 2  |
| D3038-14      | 194    | 842     | 1110    | 0.74 | 0.31759 | 0.01065 | 0.04295 | 0.00039 | 280  | 8  | 271  | 2  |
| D3038-15*     | 262    | 1240    | 1397    | 0.87 | 0.32884 | 0.01166 | 0.04035 | 0.00039 | 289  | 9  | 255  | 2  |
| PM302-7-1-1*  | 143    | 560     | 1107    | 0.51 | 0.36743 | 0.01128 | 0.04452 | 0.00079 | 318  | 8  | 281  | 5  |
| PM302-7-1-2*  | 78     | 210     | 306     | 0.69 | 0.30319 | 0.00681 | 0.03668 | 0.00063 | 269  | 5  | 232  | 4  |
| PM302-7-1-3   | 63     | 245     | 397     | 0.62 | 0.29056 | 0.01314 | 0.04062 | 0.00073 | 259  | 10 | 257  | 5  |
| PM302-7-1-4   | 112    | 308     | 714     | 0.43 | 0.28800 | 0.00822 | 0.04014 | 0.00090 | 257  | 6  | 254  | 6  |
| PM302-7-1-5*  | 125    | 681     | 738     | 0.92 | 0.56001 | 0.01652 | 0.02889 | 0.00080 | 452  | 11 | 184  | 5  |
| PM302-7-1-6   | 97     | 538     | 891     | 0.60 | 0.29314 | 0.00803 | 0.04008 | 0.00080 | 261  | 6  | 253  | 5  |
| PM302-7-1-7   | 146    | 342     | 607     | 0.56 | 0.29222 | 0.00872 | 0.04251 | 0.00105 | 260  | 7  | 268  | 6  |
| PM302-7-1-8*  | 87     | 469     | 714     | 0.66 | 0.29663 | 0.00978 | 0.03929 | 0.00093 | 264  | 8  | 248  | 6  |
| PM302-7-1-9*  | 182    | 208     | 181     | 1.15 | 0.34545 | 0.00989 | 0.04161 | 0.00090 | 301  | 7  | 263  | 6  |
| PM302-7-1-10  | 60     | 381     | 578     | 0.66 | 0.31256 | 0.00848 | 0.04335 | 0.00094 | 276  | 7  | 274  | 6  |
| PM302-7-1-11* | 89     | 283     | 562     | 0.50 | 0.34706 | 0.01299 | 0.04777 | 0.00100 | 303  | 10 | 301  | 6  |
| PM302-7-1-14  | 92     | 526     | 761     | 0.69 | 0.28641 | 0.01539 | 0.04069 | 0.00101 | 256  | 12 | 257  | 6  |
| PM302-7-1-15* | 118    | 447     | 783     | 0.57 | 0.32985 | 0.00927 | 0.04464 | 0.00085 | 289  | 7  | 282  | 5  |
| PM302-7-1-16* | 152    | 398     | 562     | 0.71 | 0.46225 | 0.02595 | 0.04254 | 0.00091 | 386  | 18 | 269  | 6  |
| PM302-7-1-17  | 201    | 329     | 589     | 0.56 | 0.29836 | 0.00896 | 0.04293 | 0.00078 | 265  | 7  | 271  | 5  |
| PM302-7-1-18* | 84     | 218     | 158     | 1.38 | 0.32349 | 0.01263 | 0.04054 | 0.00087 | 285  | 10 | 256  | 5  |
| PM302-7-1-19  | 128    | 318     | 649     | 0.49 | 0.28353 | 0.00887 | 0.03900 | 0.00079 | 253  | 7  | 247  | 5  |
| PM302-7-1-20* | 137    | 230     | 430     | 0.54 | 0.39362 | 0.01650 | 0.04532 | 0.00099 | 337  | 12 | 286  | 6  |
| PM302-7-1-21  | 124    | 468     | 730     | 0.64 | 0.30164 | 0.01239 | 0.04220 | 0.00097 | 268  | 10 | 266  | 6  |
| PM302-7-1-22  | 142    | 416     | 789     | 0.53 | 0.29491 | 0.00815 | 0.04178 | 0.00072 | 262  | 6  | 264  | 4  |
| PM302-7-1-23  | 163    | 259     | 551     | 0.47 | 0.30226 | 0.01088 | 0.04193 | 0.00119 | 268  | 8  | 265  | 7  |
| PM302-7-1-24  | 92     | 271     | 490     | 0.55 | 0.28809 | 0.00954 | 0.04038 | 0.00129 | 257  | 8  | 255  | 8  |
| PM302-7-1-25  | 74     | 521     | 823     | 0.63 | 0.28540 | 0.01095 | 0.04068 | 0.00128 | 255  | 9  | 257  | 8  |
| D5695-01      | 5      | 45      | 95      | 0.48 | 0.29646 | 0.01537 | 0.04171 | 0.00078 | 264  | 12 | 263  | 5  |
| D5695-02*     | 94     | 167     | 226     | 0.74 | 5.11548 | 0.16795 | 0.31990 | 0.00521 | 1839 | 28 | 1789 | 25 |
| D5695-03      | 6      | 74      | 125     | 0.60 | 0.29109 | 0.01448 | 0.04103 | 0.00075 | 259  | 11 | 259  | 5  |
| D5695-04      | 19     | 374     | 337     | 1.11 | 0.30132 | 0.01029 | 0.04136 | 0.00067 | 267  | 8  | 261  | 4  |
| D5695-05*     | 124    | 95      | 329     | 0.29 | 5.18704 | 0.10556 | 0.32701 | 0.00498 | 1850 | 17 | 1824 | 24 |
| D5695-06      | 8      | 83      | 157     | 0.53 | 0.29554 | 0.01493 | 0.04160 | 0.00074 | 263  | 12 | 263  | 5  |
| D5695-07      | 8      | 106     | 162     | 0.65 | 0.29460 | 0.01153 | 0.04149 | 0.00071 | 262  | 9  | 262  | 4  |
| D5695-08      | 13     | 212     | 263     | 0.81 | 0.29402 | 0.01197 | 0.04075 | 0.00069 | 262  | 9  | 257  | 4  |
| D5695-09      | 17     | 248     | 345     | 0.72 | 0.29333 | 0.01053 | 0.04136 | 0.00070 | 261  | 8  | 261  | 4  |
| D5695-10      | 18     | 314     | 343     | 0.92 | 0.27931 | 0.00807 | 0.04037 | 0.00066 | 250  | 6  | 255  | 4  |
| D5695-11      | 27     | 629     | 465     | 1.35 | 0.29009 | 0.00776 | 0.04092 | 0.00065 | 259  | 6  | 259  | 4  |
| D5695-12      | 11     | 149     | 218     | 0.68 | 0.29509 | 0.01233 | 0.04154 | 0.00071 | 263  | 10 | 262  | 4  |
| D5695-13*     | 6      | 77      | 103     | 0.75 | 0.26525 | 0.01890 | 0.04178 | 0.00077 | 239  | 15 | 264  | 5  |
| D5695-14      | 15     | 268     | 294     | 0.91 | 0.29038 | 0.01240 | 0.04101 | 0.00073 | 259  | 10 | 259  | 5  |
| D5695-15      | 16     | 210     | 323     | 0.65 | 0.29369 | 0.00891 | 0.04136 | 0.00068 | 261  | 7  | 261  | 4  |
| D5695-16      | 14     | 258     | 275     | 0.94 | 0.29097 | 0.00946 | 0.04097 | 0.00069 | 259  | 7  | 259  | 4  |
| D5695-17      | 10     | 115     | 209     | 0.55 | 0.29103 | 0.01044 | 0.04097 | 0.00071 | 259  | 8  | 259  | 4  |
| D5695-18      | 10     | 163     | 202     | 0.81 | 0.29562 | 0.01069 | 0.04171 | 0.00073 | 263  | 8  | 263  | 5  |
| D5695-19      | 10     | 128     | 218     | 0.59 | 0.28881 | 0.01059 | 0.04079 | 0.00072 | 258  | 8  | 258  | 4  |
| D5695-20      | 8      | 145     | 158     | 0.91 | 0.29332 | 0.01320 | 0.04134 | 0.00076 | 261  | 10 | 261  | 5  |
| D5695-21      | 5      | 51      | 106     | 0.48 | 0.30420 | 0.01401 | 0.04172 | 0.00079 | 270  | 11 | 263  | 5  |
| D5695-22      | 22     | 457     | 406     | 1.13 | 0.29273 | 0.00804 | 0.04123 | 0.00068 | 261  | 6  | 260  | 4  |
| D5695-23      | 15     | 247     | 293     | 0.84 | 0.29101 | 0.00930 | 0.04109 | 0.00070 | 259  | 7  | 260  | 4  |
| D5695-24      | 9      | 97      | 196     | 0.50 | 0.29350 | 0.01446 | 0.04133 | 0.00076 | 261  | 11 | 261  | 5  |
| D5695-25      | 19     | 304     | 374     | 0.81 | 0.29439 | 0.00918 | 0.04154 | 0.00070 | 262  | 7  | 262  | 4  |
| T310-01       | 536.76 | 1692.88 | 3923.57 | 0.43 | 0.30160 | 0.00673 | 0.04047 | 0.00051 | 268  | 5  | 256  | 3  |
| T310-02       | 281.09 | 1252.29 | 1331.13 | 0.94 | 0.29487 | 0.00837 | 0.03955 | 0.00050 | 262  | 7  | 250  | 3  |
| T310-03       | 416.87 | 1847.32 | 1939.62 | 0.95 | 0.28007 | 0.00672 | 0.03957 | 0.00049 | 251  | 5  | 250  | 3  |
| T310-04       | 115.32 | 492.23  | 375.97  | 1.31 | 0.29540 | 0.01767 | 0.04120 | 0.00068 | 263  | 14 | 260  | 4  |

|                |        |         |         |      |         |         |         |         |      |    |      |    |
|----------------|--------|---------|---------|------|---------|---------|---------|---------|------|----|------|----|
| T310-05        | 408.73 | 1756.70 | 2111.76 | 0.83 | 0.28636 | 0.00677 | 0.03985 | 0.00042 | 256  | 5  | 252  | 3  |
| T310-06        | 428.20 | 1822.41 | 2314.77 | 0.79 | 0.28534 | 0.01248 | 0.03952 | 0.00059 | 255  | 10 | 250  | 4  |
| T310-07        | 323.22 | 1566.83 | 873.27  | 1.79 | 0.31435 | 0.00993 | 0.04004 | 0.00050 | 278  | 8  | 253  | 3  |
| T310-08        | 297.57 | 1337.49 | 1285.46 | 1.04 | 0.28482 | 0.00749 | 0.03991 | 0.00048 | 254  | 6  | 252  | 3  |
| T310-09        | 229.28 | 1005.60 | 852.70  | 1.18 | 0.30318 | 0.02609 | 0.04024 | 0.00087 | 269  | 20 | 254  | 5  |
| T310-10        | 471.42 | 1958.81 | 1878.41 | 1.04 | 0.30301 | 0.00679 | 0.03994 | 0.00049 | 269  | 5  | 252  | 3  |
| T310-11        | 257.83 | 1085.44 | 914.55  | 1.19 | 0.30877 | 0.01186 | 0.04029 | 0.00057 | 273  | 9  | 255  | 4  |
| T310-12        | 285.22 | 1138.60 | 1496.03 | 0.76 | 0.28694 | 0.00678 | 0.04034 | 0.00056 | 256  | 5  | 255  | 3  |
| T310-13        | 121.55 | 521.33  | 502.17  | 1.04 | 0.31047 | 0.01252 | 0.04101 | 0.00060 | 275  | 10 | 259  | 4  |
| T310-14        | 81.67  | 325.90  | 249.62  | 1.31 | 0.29230 | 0.01372 | 0.04041 | 0.00058 | 260  | 11 | 255  | 4  |
| T310-15        | 50.51  | 228.11  | 214.42  | 1.06 | 0.28330 | 0.02668 | 0.03942 | 0.00166 | 253  | 21 | 249  | 10 |
| PM401-17-1-01  | 27.64  | 588.05  | 527.25  | 1.12 | 0.28126 | 0.01150 | 0.03981 | 0.00060 | 252  | 9  | 252  | 4  |
| PM401-17-1-02  | 18.00  | 288.25  | 367.11  | 0.79 | 0.28591 | 0.01406 | 0.04035 | 0.00061 | 255  | 11 | 255  | 4  |
| PM401-17-1-03* | 35.92  | 628.21  | 546.82  | 1.15 | 0.60911 | 0.05187 | 0.04635 | 0.00133 | 483  | 33 | 292  | 8  |
| PM401-17-1-04  | 10.78  | 238.88  | 198.34  | 1.20 | 0.29578 | 0.02128 | 0.04100 | 0.00091 | 263  | 17 | 259  | 6  |
| PM401-17-1-05  | 22.17  | 445.98  | 440.88  | 1.01 | 0.29486 | 0.01734 | 0.03991 | 0.00070 | 262  | 14 | 252  | 4  |
| PM401-17-1-06  | 8.36   | 351.50  | 124.18  | 2.83 | 0.29650 | 0.04611 | 0.03975 | 0.00184 | 264  | 36 | 251  | 11 |
| PM401-17-1-07  | 19.30  | 324.16  | 379.72  | 0.85 | 0.25659 | 0.04024 | 0.04148 | 0.00122 | 232  | 33 | 262  | 8  |
| PM401-17-1-08  | 41.13  | 967.02  | 857.05  | 1.13 | 0.28874 | 0.01432 | 0.04007 | 0.00070 | 258  | 11 | 253  | 4  |
| PM401-17-1-09* | 69.64  | 115.89  | 267.10  | 0.43 | 3.16082 | 0.12152 | 0.23906 | 0.00659 | 1448 | 30 | 1382 | 34 |
| PM401-17-1-10* | 17.08  | 267.36  | 290.77  | 0.92 | 0.42117 | 0.03195 | 0.04507 | 0.00087 | 357  | 23 | 284  | 5  |
| PM401-17-1-11  | 40.91  | 690.36  | 869.49  | 0.79 | 0.28048 | 0.01286 | 0.03960 | 0.00080 | 251  | 10 | 250  | 5  |
| PM401-17-1-12  | 20.64  | 452.68  | 386.05  | 1.17 | 0.27924 | 0.01681 | 0.04186 | 0.00078 | 250  | 13 | 264  | 5  |
| PM401-17-1-13  | 8.66   | 344.00  | 121.57  | 2.83 | 0.28707 | 0.09547 | 0.04024 | 0.00254 | 256  | 75 | 254  | 16 |
| PM401-17-1-14  | 25.74  | 553.53  | 510.92  | 1.08 | 0.30917 | 0.04021 | 0.04042 | 0.00196 | 274  | 31 | 255  | 12 |
| PM401-17-1-15  | 55.41  | 640.08  | 1248.37 | 0.51 | 0.28769 | 0.01816 | 0.03971 | 0.00103 | 257  | 14 | 251  | 6  |
| PM401-17-1-16  | 17.74  | 370.66  | 337.93  | 1.10 | 0.29893 | 0.01192 | 0.04090 | 0.00072 | 266  | 9  | 258  | 4  |
| PM401-17-1-17  | 30.53  | 482.90  | 601.61  | 0.80 | 0.30815 | 0.01351 | 0.04191 | 0.00065 | 273  | 10 | 265  | 4  |
| PM401-17-1-18  | 59.48  | 1276.75 | 1155.71 | 1.10 | 0.28042 | 0.00827 | 0.03964 | 0.00053 | 251  | 7  | 251  | 3  |
| PM401-17-1-19  | 52.15  | 968.22  | 1014.04 | 0.95 | 0.31734 | 0.07809 | 0.04129 | 0.00082 | 280  | 60 | 261  | 5  |
| PM401-17-1-20  | 6.54   | 142.11  | 121.20  | 1.17 | 0.32067 | 0.04890 | 0.04176 | 0.00295 | 282  | 38 | 264  | 18 |
| PM305-21-1-01  | 39.65  | 787.04  | 862.99  | 0.91 | 0.28533 | 0.00806 | 0.03995 | 0.00054 | 255  | 6  | 253  | 3  |
| PM305-21-1-02* | 43.50  | 891.61  | 1059.24 | 0.84 | 0.24311 | 0.00652 | 0.03579 | 0.00048 | 221  | 5  | 227  | 3  |
| PM305-21-1-03  | 60.28  | 1415.29 | 1193.15 | 1.19 | 0.28390 | 0.00716 | 0.04115 | 0.00055 | 254  | 6  | 260  | 3  |
| PM305-21-1-04  | 108.96 | 3199.17 | 1972.83 | 1.62 | 0.28742 | 0.00717 | 0.04100 | 0.00055 | 257  | 6  | 259  | 3  |
| PM305-21-1-05  | 36.89  | 716.16  | 794.71  | 0.90 | 0.28101 | 0.00762 | 0.04059 | 0.00055 | 251  | 6  | 256  | 3  |
| PM305-21-1-06  | 107.72 | 3451.06 | 1883.18 | 1.83 | 0.28833 | 0.00749 | 0.04110 | 0.00055 | 257  | 6  | 260  | 3  |
| PM305-21-1-07  | 37.06  | 834.76  | 775.81  | 1.08 | 0.28279 | 0.00783 | 0.04027 | 0.00055 | 253  | 6  | 255  | 3  |
| PM305-21-1-08* | 14.45  | 479.70  | 487.87  | 0.98 | 0.17455 | 0.00548 | 0.02565 | 0.00036 | 163  | 5  | 163  | 2  |
| PM305-21-1-09  | 90.33  | 2357.00 | 1717.96 | 1.37 | 0.28515 | 0.00736 | 0.04120 | 0.00055 | 255  | 6  | 260  | 3  |
| PM305-21-1-10  | 109.93 | 3669.51 | 1908.99 | 1.92 | 0.28683 | 0.00731 | 0.04057 | 0.00054 | 256  | 6  | 256  | 3  |
| PM305-21-1-11  | 109.85 | 115.15  | 352.22  | 0.33 | 4.58226 | 0.12273 | 0.30546 | 0.00410 | 1746 | 22 | 1718 | 20 |
| PM305-21-1-12  | 17.29  | 309.25  | 386.06  | 0.80 | 0.29523 | 0.00994 | 0.04012 | 0.00056 | 263  | 8  | 254  | 3  |
| PM305-21-1-13  | 83.19  | 2491.27 | 1582.27 | 1.57 | 0.28095 | 0.00731 | 0.04008 | 0.00054 | 251  | 6  | 253  | 3  |
| PM305-21-1-14  | 11.45  | 268.12  | 169.24  | 1.58 | 0.38291 | 0.01365 | 0.05207 | 0.00073 | 329  | 10 | 327  | 4  |
| PM305-21-1-15  | 17.10  | 112.88  | 340.36  | 0.33 | 0.37062 | 0.01225 | 0.05139 | 0.00072 | 320  | 9  | 323  | 4  |
| PM305-21-1-16  | 283.95 | 627.09  | 599.23  | 1.05 | 7.18168 | 0.18675 | 0.39052 | 0.00523 | 2134 | 23 | 2125 | 24 |
| PM305-21-1-17  | 74.74  | 2170.05 | 1384.81 | 1.57 | 0.28795 | 0.00765 | 0.04126 | 0.00056 | 257  | 6  | 261  | 3  |
| PM305-21-1-18  | 228.59 | 198.16  | 716.33  | 0.28 | 4.80778 | 0.12645 | 0.31784 | 0.00426 | 1786 | 22 | 1779 | 21 |
| PM305-21-1-19  | 30.72  | 738.47  | 620.23  | 1.19 | 0.29821 | 0.00960 | 0.04123 | 0.00058 | 265  | 8  | 260  | 4  |
| PM305-21-1-20  | 281.37 | 276.01  | 860.74  | 0.32 | 4.88528 | 0.12780 | 0.32237 | 0.00432 | 1800 | 22 | 1801 | 21 |
| PM305-21-1-21  | 46.35  | 1013.23 | 985.23  | 1.03 | 0.29087 | 0.00846 | 0.04021 | 0.00055 | 259  | 7  | 254  | 3  |
| PM305-21-1-22  | 74.98  | 2261.18 | 1439.28 | 1.57 | 0.28381 | 0.00793 | 0.04022 | 0.00055 | 254  | 6  | 254  | 3  |
| PM305-21-1-23  | 46.34  | 1260.91 | 942.93  | 1.34 | 0.28683 | 0.00824 | 0.03971 | 0.00054 | 256  | 7  | 251  | 3  |

\*Representing the abandoned points when calculating weighted average age because of discordance.

**Table S2.** Major (wt%) and trace (ppm) elements data of Permian granites in the Chifeng area.

| Sample                             | PM105-2-1    | PM105-2-2 | PM105-2-3 | PM105-2-4 | PM105-2-5 | PM105-4-1 |
|------------------------------------|--------------|-----------|-----------|-----------|-----------|-----------|
| Lithology                          | Monzogranite |           |           |           |           |           |
| Pluton                             | Aohan Banner |           |           |           |           |           |
| SiO <sub>2</sub>                   | 72.00        | 72.34     | 72.10     | 73.37     | 72.45     | 72.02     |
| TiO <sub>2</sub>                   | 0.20         | 0.12      | 0.13      | 0.12      | 0.18      | 0.18      |
| Al <sub>2</sub> O <sub>3</sub>     | 14.57        | 14.17     | 14.41     | 14.43     | 14.53     | 14.62     |
| TFe <sub>2</sub> O <sub>3</sub>    | 2.73         | 2.68      | 2.87      | 2.56      | 2.38      | 2.87      |
| FeO                                | 0.81         | 0.70      | 0.76      | 0.67      | 0.40      | 0.76      |
| MnO                                | 0.02         | 0.02      | 0.02      | 0.02      | 0.02      | 0.03      |
| MgO                                | 0.09         | 0.06      | 0.02      | 0.04      | 0.16      | 0.15      |
| CaO                                | 0.34         | 0.34      | 0.34      | 0.31      | 0.36      | 0.32      |
| Na <sub>2</sub> O                  | 4.38         | 4.46      | 4.67      | 3.94      | 4.22      | 4.13      |
| K <sub>2</sub> O                   | 4.53         | 4.70      | 4.63      | 4.32      | 4.49      | 4.69      |
| P <sub>2</sub> O <sub>5</sub>      | 0.07         | 0.05      | 0.05      | 0.04      | 0.06      | 0.07      |
| LOI                                | 0.88         | 0.64      | 0.56      | 0.63      | 0.95      | 0.73      |
| Total                              | 100.6        | 100.2     | 100.5     | 100.4     | 100.1     | 100.5     |
| Na <sub>2</sub> O+K <sub>2</sub> O | 8.91         | 9.17      | 9.30      | 8.26      | 8.71      | 8.82      |
| Na <sub>2</sub> O/K <sub>2</sub> O | 0.97         | 0.95      | 1.01      | 0.91      | 0.94      | 0.88      |
| A/NK                               | 1.20         | 1.14      | 1.14      | 1.29      | 1.23      | 1.23      |
| A/CNK                              | 1.14         | 1.09      | 1.08      | 1.23      | 1.17      | 1.17      |
| SI                                 | 0.69         | 0.45      | 0.13      | 0.38      | 1.35      | 1.18      |
| AR                                 | 3.85         | 4.20      | 4.41      | 3.30      | 3.62      | 3.47      |
| σ43                                | 2.73         | 2.86      | 2.97      | 2.24      | 2.56      | 2.68      |
| R1                                 | 2093         | 2054      | 1968      | 2398      | 2222      | 2144      |
| R2                                 | 328          | 319       | 321       | 320       | 334       | 330       |
| Mg <sup>#</sup>                    | 0.07         | 0.05      | 0.01      | 0.04      | 0.21      | 0.11      |
| La                                 | 33.01        | 34.66     | 34.50     | 34.20     | 30.46     | 11.16     |
| Ce                                 | 65.06        | 70.53     | 69.45     | 69.18     | 61.78     | 30.19     |
| Pr                                 | 7.00         | 7.07      | 6.93      | 6.91      | 6.65      | 2.49      |
| Nd                                 | 25.43        | 24.49     | 24.38     | 24.07     | 24.00     | 9.53      |
| Sm                                 | 5.08         | 4.60      | 4.55      | 4.48      | 4.88      | 2.12      |
| Eu                                 | 0.67         | 0.61      | 1.03      | 0.57      | 0.62      | 0.39      |
| Gd                                 | 4.18         | 3.62      | 3.64      | 3.62      | 4.06      | 2.01      |
| Tb                                 | 0.75         | 0.63      | 0.62      | 0.61      | 0.73      | 0.43      |
| Dy                                 | 4.53         | 3.75      | 3.71      | 3.69      | 4.30      | 2.91      |
| Ho                                 | 0.89         | 0.75      | 0.73      | 0.74      | 0.83      | 0.60      |
| Er                                 | 2.31         | 2.18      | 2.14      | 1.99      | 2.25      | 1.71      |
| Tm                                 | 0.42         | 0.37      | 0.36      | 0.35      | 0.37      | 0.32      |
| Yb                                 | 2.84         | 2.65      | 2.57      | 2.49      | 2.63      | 2.26      |
| Lu                                 | 0.41         | 0.39      | 0.39      | 0.37      | 0.39      | 0.34      |
| Y                                  | 25.20        | 21.83     | 20.92     | 21.06     | 23.61     | 17.31     |
| ΣREE                               | 152.5        | 156.2     | 154.9     | 153.2     | 143.9     | 66.45     |
| LREE                               | 136.2        | 141.9     | 140.8     | 139.4     | 128.3     | 55.88     |
| HREE                               | 16.33        | 14.34     | 14.16     | 13.86     | 15.56     | 10.56     |
| LREE/HREE                          | 8.35         | 9.90      | 9.95      | 10.06     | 8.25      | 5.29      |
| La <sub>N</sub> /Yb <sub>N</sub>   | 8.34         | 9.39      | 9.62      | 9.84      | 8.30      | 3.54      |
| δEu                                | 0.43         | 0.44      | 0.75      | 0.42      | 0.42      | 0.57      |
| δCe                                | 1.00         | 1.04      | 1.04      | 1.04      | 1.02      | 1.35      |
| Sc                                 | 2.87         | 2.39      | 3.13      | 2.52      | 3.85      | 3.56      |
| V                                  | 22.02        | 15.04     | 18.04     | 16.52     | 20.21     | 19.27     |
| Cr                                 | 23.69        | 37.52     | 29.17     | 29.64     | 44.66     | 28.67     |
| Co                                 | 4.42         | 2.21      | 3.30      | 1.62      | 4.55      | 3.11      |
| Ni                                 | 1.31         | 0.35      | 2.83      | 1.65      | 2.28      | 1.40      |

|                                        |              |         |         |         |         |         |
|----------------------------------------|--------------|---------|---------|---------|---------|---------|
| Be                                     | 4.07         | 4.05    | 4.12    | 4.09    | 3.92    | 4.55    |
| Rb                                     | 216          | 212     | 210     | 212     | 215     | 238     |
| Sr                                     | 69.73        | 66.09   | 66.71   | 65.21   | 66.24   | 67.09   |
| Ba                                     | 313          | 342     | 344     | 333     | 311     | 313     |
| Li                                     | 5.71         | 6.13    | 6.09    | 6.08    | 5.73    | 7.13    |
| Zr                                     | 181          | 171     | 178     | 176     | 161     | 178     |
| Nb                                     | 26.46        | 27.70   | 27.39   | 28.17   | 24.71   | 30.63   |
| Hf                                     | 5.26         | 5.20    | 5.31    | 4.80    | 5.59    | 5.12    |
| Ta                                     | 1.82         | 1.41    | 1.09    | 1.46    | 1.51    | 1.51    |
| Th                                     | 11.02        | 14.81   | 20.02   | 17.50   | 14.80   | 17.17   |
| U                                      | 2.01         | 1.18    | 1.19    | 1.23    | 1.88    | 1.30    |
| Ga                                     | 19.08        | 18.53   | 18.81   | 19.77   | 18.92   | 20.35   |
| Sr/Y                                   | 2.77         | 3.03    | 3.19    | 3.10    | 2.81    | 3.88    |
| Zr+Nb+Ce+Y                             | 298          | 291     | 296     | 294     | 272     | 256     |
| Na <sub>2</sub> O+K <sub>2</sub> O/CaO | 25.90        | 26.76   | 27.03   | 26.30   | 24.52   | 27.22   |
| TFe <sub>2</sub> O <sub>3</sub> /MgO   | 31.72        | 47.92   | 168.82  | 59.60   | 15.25   | 19.50   |
| YbN                                    | 16.71        | 15.57   | 15.14   | 14.66   | 15.48   | 13.29   |
| Y+Nb                                   | 51.66        | 49.53   | 48.31   | 49.23   | 48.32   | 47.94   |
| Yb+Ta                                  | 4.66         | 4.06    | 3.66    | 3.96    | 4.14    | 3.77    |
| TFe <sub>2</sub> O <sub>3</sub> +MgO   | 2.81         | 2.74    | 2.89    | 2.61    | 2.54    | 3.01    |
| Sample                                 | D3038-1      | D3038-2 | D3038-3 | D3047-1 | D3048-1 | D3049-1 |
| Lithology                              | Monzogranite |         |         |         |         |         |
| Pluton                                 | Daluobogou   |         |         |         |         |         |
| SiO <sub>2</sub>                       | 73.40        | 73.49   | 74.11   | 73.47   | 73.83   | 73.60   |
| TiO <sub>2</sub>                       | 0.18         | 0.17    | 0.18    | 0.18    | 0.18    | 0.16    |
| Al <sub>2</sub> O <sub>3</sub>         | 14.21        | 13.92   | 13.94   | 14.23   | 13.93   | 14.14   |
| TFe <sub>2</sub> O <sub>3</sub>        | 1.85         | 1.94    | 1.42    | 1.57    | 1.66    | 1.49    |
| FeO                                    | 0.85         | 1.12    | 0.58    | 0.63    | 0.67    | 0.49    |
| MnO                                    | 0.05         | 0.04    | 0.04    | 0.03    | 0.03    | 0.03    |
| MgO                                    | 0.20         | 0.20    | 0.20    | 0.20    | 0.20    | 0.20    |
| CaO                                    | 0.29         | 0.26    | 0.21    | 0.25    | 0.22    | 0.24    |
| Na <sub>2</sub> O                      | 3.60         | 3.89    | 3.83    | 3.77    | 3.68    | 3.96    |
| K <sub>2</sub> O                       | 5.79         | 5.62    | 5.47    | 5.76    | 5.64    | 5.80    |
| P <sub>2</sub> O <sub>5</sub>          | 0.03         | 0.03    | 0.03    | 0.03    | 0.03    | 0.03    |
| LOI                                    | 0.27         | 0.17    | 0.43    | 0.38    | 0.39    | 0.26    |
| Total                                  | 100.7        | 100.8   | 100.4   | 100.5   | 100.4   | 100.4   |
| Na <sub>2</sub> O+K <sub>2</sub> O     | 9.39         | 9.51    | 9.30    | 9.53    | 9.32    | 9.76    |
| Na <sub>2</sub> O/K <sub>2</sub> O     | 0.62         | 0.69    | 0.70    | 0.66    | 0.65    | 0.68    |
| A/NK                                   | 1.17         | 1.12    | 1.14    | 1.14    | 1.15    | 1.11    |
| A/CNK                                  | 1.12         | 1.07    | 1.11    | 1.10    | 1.11    | 1.07    |
| SI                                     | 1.63         | 1.57    | 1.75    | 1.68    | 1.70    | 1.68    |
| AR                                     | 2.97         | 3.43    | 3.36    | 3.18    | 3.17    | 3.45    |
| σ43                                    | 2.91         | 2.97    | 2.78    | 2.98    | 2.82    | 3.11    |
| R1                                     | 2174         | 2102    | 2242    | 2145    | 2226    | 2084    |
| R2                                     | 319          | 309     | 306     | 316     | 307     | 312     |
| Mg <sup>#</sup>                        | 0.14         | 0.11    | 0.19    | 0.17    | 0.17    | 0.21    |
| La                                     | 55.58        | 61.76   | 78.39   | 79.41   | 56.52   | 73.00   |
| Ce                                     | 163          | 157     | 171     | 169     | 144     | 159     |
| Pr                                     | 10.81        | 12.01   | 15.09   | 15.28   | 11.19   | 14.21   |
| Nd                                     | 37.64        | 41.57   | 51.50   | 52.40   | 40.11   | 48.38   |
| Sm                                     | 5.69         | 6.17    | 7.37    | 7.46    | 5.56    | 6.90    |
| Eu                                     | 0.72         | 0.75    | 0.76    | 0.76    | 0.72    | 0.75    |
| Gd                                     | 5.05         | 5.46    | 6.20    | 6.27    | 5.08    | 5.91    |
| Tb                                     | 0.68         | 0.72    | 0.82    | 0.81    | 0.69    | 0.79    |
| Dy                                     | 3.34         | 3.55    | 3.75    | 3.80    | 3.39    | 3.93    |
| Ho                                     | 0.64         | 0.68    | 0.69    | 0.70    | 0.60    | 0.74    |
| Er                                     | 1.60         | 1.71    | 1.78    | 1.80    | 1.72    | 1.89    |

|                                        |              |           |           |           |           |           |
|----------------------------------------|--------------|-----------|-----------|-----------|-----------|-----------|
| Tm                                     | 0.29         | 0.29      | 0.30      | 0.30      | 0.28      | 0.32      |
| Yb                                     | 2.04         | 2.07      | 2.10      | 2.12      | 1.99      | 2.21      |
| Lu                                     | 0.30         | 0.31      | 0.31      | 0.32      | 0.32      | 0.33      |
| Y                                      | 14.53        | 16.23     | 17.36     | 17.60     | 17.87     | 15.20     |
| ΣREE                                   | 288.0        | 294.0     | 340.6     | 341.0     | 272.5     | 318.9     |
| LREE                                   | 274.1        | 279.2     | 324.7     | 324.9     | 258.4     | 302.8     |
| HREE                                   | 13.93        | 14.79     | 15.93     | 16.12     | 14.08     | 16.11     |
| LREE/HREE                              | 19.68        | 18.88     | 20.38     | 20.16     | 18.36     | 18.80     |
| La <sub>N</sub> /Yb <sub>N</sub>       | 19.58        | 21.45     | 26.75     | 26.88     | 20.36     | 23.66     |
| δEu                                    | 0.40         | 0.38      | 0.34      | 0.33      | 0.41      | 0.35      |
| δCe                                    | 1.54         | 1.33      | 1.15      | 1.12      | 1.32      | 1.14      |
| Sc                                     | 3.08         | 3.94      | 3.53      | 3.70      | 3.63      | 3.65      |
| V                                      | 11.65        | 10.16     | 10.76     | 12.78     | 10.00     | 10.00     |
| Cr                                     | 15.77        | 20.33     | 21.14     | 17.87     | 26.35     | 22.03     |
| Co                                     | 2.76         | 2.75      | 1.03      | 2.12      | 1.06      | 2.53      |
| Ni                                     | 2.00         | 2.00      | 2.00      | 2.00      | 2.00      | 2.00      |
| Be                                     | 1.79         | 1.80      | 1.83      | 1.85      | 1.78      | 1.82      |
| Rb                                     | 142          | 141       | 136       | 142       | 139       | 140       |
| Sr                                     | 59.44        | 59.27     | 56.48     | 57.78     | 55.85     | 59.24     |
| Ba                                     | 234          | 227       | 218       | 226       | 227       | 238       |
| Li                                     | 5.11         | 5.31      | 6.85      | 6.74      | 6.51      | 5.40      |
| Zr                                     | 210          | 211       | 207       | 214       | 205       | 197       |
| Nb                                     | 18.64        | 18.23     | 17.33     | 18.39     | 18.33     | 18.10     |
| Hf                                     | 3.88         | 1.13      | 1.06      | 1.22      | 1.08      | 1.09      |
| Ta                                     | 0.97         | 0.70      | 0.61      | 0.80      | 0.92      | 0.90      |
| Th                                     | 13.46        | 13.48     | 14.10     | 14.59     | 13.07     | 14.33     |
| U                                      | 0.90         | 0.82      | 0.94      | 0.97      | 1.07      | 0.86      |
| Sr/Y                                   | 4.09         | 3.65      | 3.25      | 3.28      | 3.13      | 3.90      |
| Zr+Nb+Ce+Y                             | 407          | 402       | 413       | 419       | 385       | 390       |
| Na <sub>2</sub> O+K <sub>2</sub> O/CaO | 32.27        | 36.16     | 44.07     | 37.66     | 42.37     | 41.00     |
| TFe <sub>2</sub> O <sub>3</sub> /MgO   | 9.24         | 9.70      | 7.12      | 7.85      | 8.29      | 7.45      |
| Yb <sub>N</sub>                        | 11.98        | 12.15     | 12.36     | 12.46     | 11.71     | 13.02     |
| Y+Nb                                   | 33.17        | 34.46     | 34.69     | 35.99     | 36.19     | 33.30     |
| Yb+Ta                                  | 3.01         | 2.77      | 2.71      | 2.92      | 2.91      | 3.11      |
| TFe <sub>2</sub> O <sub>3</sub> +MgO   | 2.05         | 2.14      | 1.62      | 1.77      | 1.86      | 1.69      |
| Sample                                 | PM103-2-1    | PM103-2-3 | PM103-4-2 | PM103-6-1 | PM103-6-2 | PM103-6-4 |
| Lithology                              | Monzogranite |           |           |           |           |           |
| Pluton                                 | Erdaogou     |           |           |           |           |           |
| SiO <sub>2</sub>                       | 76.91        | 76.32     | 77.20     | 76.36     | 77.16     | 76.29     |
| TiO <sub>2</sub>                       | 0.07         | 0.07      | 0.07      | 0.06      | 0.06      | 0.06      |
| Al <sub>2</sub> O <sub>3</sub>         | 12.93        | 12.87     | 12.77     | 12.99     | 12.75     | 12.81     |
| TFe <sub>2</sub> O <sub>3</sub>        | 0.85         | 1.26      | 0.83      | 1.23      | 0.97      | 1.57      |
| FeO                                    | 0.36         | 0.81      | 0.49      | 0.63      | 0.58      | 0.97      |
| MnO                                    | 0.01         | 0.08      | 0.01      | 0.02      | 0.01      | 0.03      |
| MgO                                    | 0.00         | 0.05      | 0.07      | 0.08      | 0.08      | 0.11      |
| CaO                                    | 0.16         | 0.18      | 0.14      | 0.14      | 0.09      | 0.11      |
| Na <sub>2</sub> O                      | 4.25         | 4.56      | 4.32      | 4.63      | 4.32      | 4.25      |
| K <sub>2</sub> O                       | 4.15         | 4.24      | 4.34      | 4.24      | 4.35      | 4.47      |
| P <sub>2</sub> O <sub>5</sub>          | 0.01         | 0.01      | 0.01      | 0.01      | 0.01      | 0.01      |
| LOI                                    | 0.38         | 0.27      | 0.18      | 0.22      | 0.17      | 0.22      |
| Total                                  | 100.0        | 100.7     | 100.4     | 100.5     | 100.5     | 100.9     |
| Na <sub>2</sub> O+K <sub>2</sub> O     | 8.40         | 8.79      | 8.67      | 8.86      | 8.67      | 8.73      |
| Na <sub>2</sub> O/K <sub>2</sub> O     | 1.02         | 1.08      | 1.00      | 1.09      | 0.99      | 0.95      |
| A/NK                                   | 1.13         | 1.07      | 1.08      | 1.07      | 1.08      | 1.08      |
| A/CNK                                  | 1.10         | 1.04      | 1.06      | 1.04      | 1.07      | 1.06      |
| SI                                     | 0.01         | 0.45      | 0.72      | 0.73      | 0.74      | 0.93      |
| AR                                     | 4.58         | 5.13      | 5.06      | 5.16      | 5.10      | 4.85      |

|                                  |              |           |           |           |           |           |
|----------------------------------|--------------|-----------|-----------|-----------|-----------|-----------|
| σ43                              | 2.08         | 2.32      | 2.20      | 2.36      | 2.20      | 2.29      |
| σ25                              | 1.36         | 1.50      | 1.44      | 1.53      | 1.44      | 1.48      |
| R1                               | 2618         | 2409      | 2549      | 2394      | 2538      | 2441      |
| R2                               | 272          | 273       | 268       | 273       | 263       | 267       |
| Mg <sup>#</sup>                  | 0.00         | 0.04      | 0.09      | 0.08      | 0.08      | 0.07      |
| La                               | 25.00        | 20.68     | 22.13     | 23.73     | 21.30     | 23.99     |
| Ce                               | 58.34        | 46.86     | 49.77     | 51.61     | 45.64     | 53.58     |
| Pr                               | 5.48         | 4.58      | 4.66      | 5.29      | 4.94      | 5.62      |
| Nd                               | 17.58        | 14.38     | 14.46     | 16.86     | 16.07     | 18.73     |
| Sm                               | 3.57         | 2.69      | 2.58      | 3.26      | 3.06      | 4.32      |
| Eu                               | 0.14         | 0.23      | 0.21      | 0.15      | 0.15      | 0.18      |
| Gd                               | 3.02         | 2.29      | 2.45      | 2.79      | 2.66      | 3.94      |
| Tb                               | 0.60         | 0.43      | 0.48      | 0.53      | 0.53      | 0.85      |
| Dy                               | 4.32         | 2.93      | 3.40      | 3.61      | 3.73      | 5.82      |
| Ho                               | 0.99         | 0.66      | 0.77      | 0.79      | 0.85      | 1.29      |
| Er                               | 2.97         | 2.04      | 2.31      | 2.39      | 2.61      | 3.82      |
| Tm                               | 0.57         | 0.40      | 0.46      | 0.46      | 0.51      | 0.72      |
| Yb                               | 4.28         | 3.13      | 3.46      | 3.36      | 3.80      | 5.25      |
| Lu                               | 0.64         | 0.47      | 0.55      | 0.51      | 0.58      | 0.80      |
| Y                                | 33.60        | 19.53     | 25.10     | 24.22     | 28.40     | 41.31     |
| ΣREE                             | 127.5        | 101.7     | 107.6     | 115.3     | 106.4     | 128.9     |
| LREE                             | 110.1        | 89.42     | 93.81     | 100.9     | 91.16     | 106.4     |
| HREE                             | 17.40        | 12.34     | 13.86     | 14.44     | 15.27     | 22.50     |
| LREE/HREE                        | 6.33         | 7.25      | 6.77      | 6.99      | 5.97      | 4.73      |
| La <sub>N</sub> /Yb <sub>N</sub> | 4.19         | 4.75      | 4.59      | 5.06      | 4.02      | 3.28      |
| δEu                              | 0.13         | 0.28      | 0.25      | 0.15      | 0.16      | 0.13      |
| δCe                              | 1.17         | 1.13      | 1.14      | 1.08      | 1.05      | 1.09      |
| Sc                               | 2.62         | 2.86      | 2.19      | 2.83      | 2.70      | 3.37      |
| V                                | 9.19         | 8.88      | 7.10      | 10.25     | 8.56      | 9.59      |
| Cr                               | 45.89        | 47.65     | 36.24     | 39.53     | 44.08     | 36.37     |
| Co                               | 0.24         | 0.69      | 0.40      | 0.20      | 0.97      | 1.43      |
| Ni                               | 0.33         | 0.73      | 1.57      | 0.21      | 0.10      | 0.24      |
| Be                               | 3.57         | 4.72      | 3.83      | 7.16      | 4.97      | 5.00      |
| Rb                               | 280          | 275       | 275       | 337       | 330       | 351       |
| Sr                               | 14.65        | 16.64     | 23.98     | 14.90     | 14.08     | 16.41     |
| Ba                               | 15.44        | 7.72      | 22.12     | 0.05      | 10.31     | 20.31     |
| Li                               | 3.44         | 3.12      | 2.66      | 3.38      | 1.88      | 3.25      |
| Zr                               | 201          | 176       | 183       | 168       | 177       | 183       |
| Nb                               | 61.23        | 46.08     | 43.83     | 52.12     | 45.37     | 57.70     |
| Hf                               | 6.72         | 5.86      | 6.97      | 5.91      | 6.04      | 7.24      |
| Ta                               | 2.75         | 1.86      | 1.78      | 2.27      | 3.02      | 2.88      |
| Th                               | 18.30        | 20.15     | 19.75     | 23.35     | 21.98     | 23.67     |
| U                                | 2.89         | 2.80      | 1.77      | 1.90      | 2.69      | 2.86      |
| Ga                               | 24.15        | 24.06     | 23.29     | 24.81     | 24.42     | 24.62     |
| Sr/Y                             | 0.44         | 0.85      | 0.96      | 0.62      | 0.50      | 0.40      |
| Zr+Nb+Ce+Y                       | 354          | 288       | 302       | 296       | 297       | 336       |
| 10000Ga/Al                       | 3.53         | 3.53      | 3.44      | 3.61      | 3.62      | 3.63      |
| Sample                           | PM403-2-1    | PM403-2-2 | PM403-2-3 | PM403-2-4 | PM403-2-5 | PM403-2-6 |
| Lithology                        | Syenogranite |           |           |           |           |           |
| Pluton                           | Qixieyingzi  |           |           |           |           |           |
| SiO <sub>2</sub>                 | 76.25        | 76.56     | 76.22     | 76.69     | 76.61     | 77.58     |
| TiO <sub>2</sub>                 | 0.09         | 0.11      | 0.10      | 0.10      | 0.09      | 0.11      |
| Al <sub>2</sub> O <sub>3</sub>   | 12.62        | 12.56     | 12.63     | 12.38     | 12.54     | 12.05     |
| TFe <sub>2</sub> O <sub>3</sub>  | 1.06         | 1.14      | 0.81      | 1.21      | 1.05      | 1.28      |
| FeO                              | 0.54         | 0.49      | 0.54      | 0.58      | 0.54      | 0.49      |
| MnO                              | 0.04         | 0.04      | 0.01      | 0.02      | 0.01      | 0.02      |
| MgO                              | 0.48         | 0.45      | 0.56      | 0.34      | 0.26      | 0.24      |

|                                    |       |        |       |       |       |        |
|------------------------------------|-------|--------|-------|-------|-------|--------|
| CaO                                | 0.24  | 0.24   | 0.25  | 0.20  | 0.17  | 0.16   |
| Na <sub>2</sub> O                  | 3.81  | 3.74   | 3.13  | 3.72  | 3.27  | 3.25   |
| K <sub>2</sub> O                   | 4.87  | 4.35   | 5.61  | 4.66  | 5.34  | 4.50   |
| P <sub>2</sub> O <sub>5</sub>      | 0.01  | 0.01   | 0.01  | 0.01  | 0.01  | 0.01   |
| LOI                                | 0.34  | 0.52   | 0.48  | 0.48  | 0.45  | 0.59   |
| Total                              | 100.3 | 100.1  | 100.3 | 100.3 | 100.3 | 100.2  |
| Na <sub>2</sub> O+K <sub>2</sub> O | 8.68  | 8.09   | 8.74  | 8.38  | 8.61  | 7.75   |
| Na <sub>2</sub> O/K <sub>2</sub> O | 0.78  | 0.86   | 0.56  | 0.80  | 0.61  | 0.72   |
| A/NK                               | 1.09  | 1.16   | 1.13  | 1.11  | 1.12  | 1.18   |
| A/CNK                              | 1.05  | 1.11   | 1.08  | 1.08  | 1.09  | 1.15   |
| SI                                 | 4.43  | 4.46   | 5.26  | 3.26  | 2.45  | 2.46   |
| AR                                 | 3.91  | 3.82   | 2.89  | 3.89  | 3.12  | 3.28   |
| σ <sub>43</sub>                    | 2.26  | 1.95   | 2.30  | 2.08  | 2.21  | 1.74   |
| σ <sub>25</sub>                    | 1.47  | 1.27   | 1.49  | 1.36  | 1.44  | 1.15   |
| R1                                 | 2544  | 2718   | 2619  | 2652  | 2652  | 2921   |
| R2                                 | 297   | 295    | 303   | 281   | 277   | 266    |
| Mg <sup>#</sup>                    | 0.37  | 0.38   | 0.41  | 0.28  | 0.24  | 0.24   |
| La                                 | 15.68 | 24.58  | 17.43 | 26.06 | 28.76 | 25.49  |
| Ce                                 | 33.81 | 52.18  | 36.51 | 55.34 | 54.36 | 55.35  |
| Pr                                 | 3.37  | 5.33   | 3.89  | 5.46  | 5.96  | 5.47   |
| Nd                                 | 11.10 | 17.38  | 12.60 | 17.50 | 18.87 | 17.93  |
| Sm                                 | 1.65  | 2.59   | 1.93  | 2.48  | 2.58  | 2.53   |
| Eu                                 | 0.26  | 0.33   | 0.25  | 0.33  | 0.31  | 0.30   |
| Gd                                 | 1.25  | 1.90   | 1.31  | 1.84  | 1.78  | 1.74   |
| Tb                                 | 0.17  | 0.24   | 0.16  | 0.21  | 0.19  | 0.20   |
| Dy                                 | 0.90  | 1.28   | 0.73  | 0.95  | 0.85  | 0.94   |
| Ho                                 | 0.17  | 0.27   | 0.14  | 0.18  | 0.21  | 0.24   |
| Er                                 | 0.63  | 0.72   | 0.55  | 0.49  | 0.54  | 0.60   |
| Tm                                 | 0.08  | 0.12   | 0.07  | 0.08  | 0.09  | 0.10   |
| Yb                                 | 0.62  | 0.87   | 0.51  | 0.63  | 0.54  | 0.69   |
| Lu                                 | 0.11  | 0.13   | 0.08  | 0.09  | 0.08  | 0.11   |
| Y                                  | 5.32  | 8.22   | 4.19  | 5.42  | 16.66 | 15.20  |
| ΣREE                               | 69.80 | 107.9  | 76.14 | 111.6 | 115.1 | 111.6  |
| LREE                               | 65.87 | 102.3  | 72.60 | 107.1 | 110.8 | 107.0  |
| HREE                               | 3.93  | 5.54   | 3.55  | 4.47  | 4.29  | 4.62   |
| LREE/HREE                          | 16.77 | 18.47  | 20.48 | 23.96 | 25.86 | 23.18  |
| La <sub>N</sub> /Yb <sub>N</sub>   | 18.05 | 20.30  | 24.32 | 29.48 | 37.99 | 26.46  |
| δEu                                | 0.54  | 0.44   | 0.45  | 0.46  | 0.42  | 0.41   |
| δCe                                | 1.09  | 1.07   | 1.04  | 1.08  | 0.96  | 1.10   |
| Sc                                 | 1.29  | 1.07   | 1.06  | 1.09  | 0.99  | 1.11   |
| V                                  | 9.59  | 10.46  | 10.26 | 12.29 | 10.36 | 12.64  |
| Cr                                 | 45.49 | 48.86  | 41.01 | 56.42 | 47.94 | 48.49  |
| Co                                 | 0.76  | 0.08   | 0.05  | 1.65  | 1.23  | 0.31   |
| Ni                                 | 0.14  | 0.43   | 1.19  | 0.42  | 0.96  | 1.18   |
| Be                                 | 1.25  | 1.11   | 1.13  | 1.25  | 1.18  | 1.15   |
| Rb                                 | 167   | 154    | 195   | 166   | 185   | 158    |
| Sr                                 | 122   | 119    | 138   | 140   | 129   | 117    |
| Ba                                 | 167   | 142    | 182   | 162   | 161   | 140    |
| Li                                 | 4.67  | 4.72   | 3.93  | 3.92  | 5.13  | 4.57   |
| Zr                                 | 84.68 | 104.33 | 86.04 | 82.96 | 67.42 | 106.93 |
| Nb                                 | 8.63  | 9.80   | 7.76  | 7.44  | 7.15  | 8.20   |
| Hf                                 | 3.14  | 3.25   | 2.17  | 2.83  | 5.82  | 7.03   |
| Ta                                 | 0.38  | 0.57   | 1.10  | 1.33  | 0.44  | 0.89   |
| Th                                 | 11.86 | 14.66  | 14.09 | 24.17 | 19.08 | 23.35  |
| U                                  | 0.96  | 2.05   | 0.45  | 0.73  | 0.61  | 0.79   |
| Ga                                 | 15.27 | 14.72  | 14.20 | 13.49 | 15.33 | 15.56  |
| Sr/Y                               | 23.07 | 14.57  | 33.00 | 25.97 | 7.75  | 7.71   |



|            |      |      |      |      |      |      |
|------------|------|------|------|------|------|------|
| Zr+Nb+Ce+Y | 132  | 174  | 134  | 151  | 145  | 185  |
| 10000Ga/Al | 2.29 | 2.21 | 2.12 | 2.06 | 2.31 | 2.44 |

---
